# Supplementary material
Source: ML conference proceedings conference paper supplement (https://proceedings.neurips.cc/paper_files/paper/2022/hash/fa73aca7b2af724fafbd4852957cd3e0-Abstract.html)
Supplement: Supplementary file 1 [file fa73aca7b2af724fafbd4852957cd3e0-Supplemental-Datasets_and_Benchmarks.pdf]

---

# DABS 2.0: Improved Datasets and Algorithms for Universal Self Supervision

---

**Alex Tamkin**<sup>†</sup>  
Stanford University

**Gaurab Banerjee**  
Stanford University

**Mohamed Owda**  
Stanford University

**Vincent Liu**  
Stanford University

**Shashank Rammoorthy**  
Stanford University

**Noah D. Goodman**  
Stanford University

## Abstract

Universal self-supervised learning (SSL) algorithms hold enormous promise for making machine learning accessible to high-impact domains such as protein biology, manufacturing, and genomics. We present DABS 2.0: a set of improved datasets and algorithms for advancing research on universal SSL. We extend the recently-introduced DABS benchmark with the addition of five real-world science and engineering domains: protein biology, bacterial genomics, multispectral satellite imagery, semiconductor wafers, and particle physics, bringing the total number of domains in the benchmark to twelve. We also propose a new universal SSL algorithm, Capri, and a generalized version of masked autoencoding, and apply both on all twelve domains—the most wide-ranging exploration of SSL yet. We find that multiple algorithms show gains across different domains, outperforming previous baselines. In addition, we demonstrate the usefulness of DABS for scientific study of SSL by investigating the optimal corruption rate for each algorithm, showing that the best setting varies based on the domain. Code will be released at <http://github.com/alexatamkin/dabs>.

## 1 Introduction

Recent months have continued to see the rise of large, self-supervised learning (SSL) models across multiple domains [28, 31, 14, 4, 21, 77]. These works have been characterized by an increasing convergence upon a similar set of methods [71, 10] generally involving large transformer model architectures trained on large-scale datasets. Despite this trend, the actual learning tasks used to train these SSL models still tend to vary significantly: contrastive, autoregressive, and denoising objectives have each claimed their own niche, and different techniques still predominate in different communities. While some prior work has moved towards a more domain-agnostic approach to SSL, these works have largely been limited to analyzing the well-studied domains of images, text, and speech [3, 6], leaving open the question of generalization to less-studied domains, including scientific, medical, and engineering settings.

The DABS benchmark [62] was developed to provide a testbed for research on universal SSL algorithms that could be applied across seven different domains, including less common settings such as wearable sensors and chest x-rays. DABS can be used to develop new and improved universal SSL algorithms, or to conduct scientific studies on pretraining and transfer across diverse domains. Crucially, **evaluating on a breadth of different domains** enables researchers to have greater confidence that their methods will generalize to a range of different settings in the real world, and also to investigate how design choices made for one domain can affect learning on others.

---

<sup>†</sup>[atamkin@stanford.edu](mailto:atamkin@stanford.edu)

While one goal of the DABS benchmark is to support research for underserved domains where there is less research on pretraining, three of seven DABS domains in the original paper were English text, natural images, and speech recordings, which have already received ample attention as settings for self-supervised learning. To accelerate research in high-impact domains where data is prevalent but human labels are scarce, we introduce **DABS 2.0, adding five new science and engineering domains** to the existing 7 domains in the DABS benchmark, each containing their own pretraining and transfer datasets. Importantly, the datasets in these domains were curated and created with the help of domain experts, and center on real-world tasks such as detecting defective semiconductor wafers or identifying exotic particles. The addition of these domains enable us to conduct the widest-ranging study of self-supervised learning yet.

We also introduce **two new universal SSL algorithms** and evaluate them on all twelve domains. The first is a generalized version of masked sequence modeling, also referred to as masked autoencoding (MAE), an approach that has seen success when applied to text [17], images [28], and videos [21, 66]. The second is a contrastive-masked algorithm called Capri that generalizes approaches previously explored in natural images [67] and audio [78], and relaxes some modality-specific components required by MAE.

Finally, we demonstrate the usefulness of DABS for studying the science of self-supervised learning by evaluating three algorithms on all 12 domains across **three different corruption fractions**, controlling the difficulty of the self-supervised task (i.e. what fraction of embeddings are masked or permuted). The resulting methods show considerable gains on certain domains. However, this improvement is not uniform across domains, revealing an important direction for future work. We also contribute new functionality to the DABS codebase, enabling **easy execution** of pretraining and transfer runs in sequence on a given accelerator to facilitate easy experimentation.

We hope these contributions help advance the study of universal self-supervision, enabling better scientific understanding and practical advancement of SSL, resulting in positive impact on real-world problems.

## 2 Domains and Datasets

Here, we describe the new datasets in DABS 2.0. In the original DABS paper [62], the benchmark domains represent a range of research communities, including communities with large bodies of work on self-supervised learning (e.g. text, natural images) to domains with more nascent streams of research (medical imaging, sensor recordings). In DABS 2.0, we bolster our focus on the latter group by adding five domains representing science and engineering fields. Importantly, the datasets in all five domains were created or curated with the help of domain experts. As in the original DABS paper [62], we choose open-access datasets, in particular preferring datasets that could be automatically downloaded given the large number of datasets in the benchmark (57). Some examples of the pretraining datasets from each domain are depicted in Figure 1, left. Similar to the original DABS domains, data loading and preprocessing within each dataset has been standardized to ensure fair comparisons; more information about data processing for each domain is provided in the Appendix.

**Bacterial Genomics** Genomic sequences are similar to text domains in that both contain sequences of discrete tokens. With new species of bacteria being discovered and sequenced every year, the field of bacterial genomics is not only data rich, but also offers the opportunity to explore how self-supervised methods generalize under temporal distributional shifts. We pretrain using the training set of the Genomics OOD Dataset [53], consisting of 1M DNA sequences across 10 bacterial classes discovered before 2011. We evaluate transfer on the in-distribution validation set of the Genomics OOD dataset, containing 100,000 labeled examples from those same bacterial classes, and on the out-of-distribution validation set containing 600,000 examples across 60 bacterial classes discovered between 2011 and 2016. To prepare the input for models, we tokenize each genomic sequence at the nucleobase level: adenine (A), cytosine (C), guanine (G), and thymine (T).

**Semiconductor Wafer Manufacturing** While natural images are a popular domain for applying SSL techniques, it remains unclear whether natural image-centric strategies will generalize to industrial settings, such as detecting defects in semiconductor wafers. To assess how SSL techniques perform on such real-world images we consider the WM-811K[74] dataset, a corpus of semiconductor wafer measurements labeled with their specific class of defect (e.g. edge-ring, donut, center, local,

# New in DABS 2.0

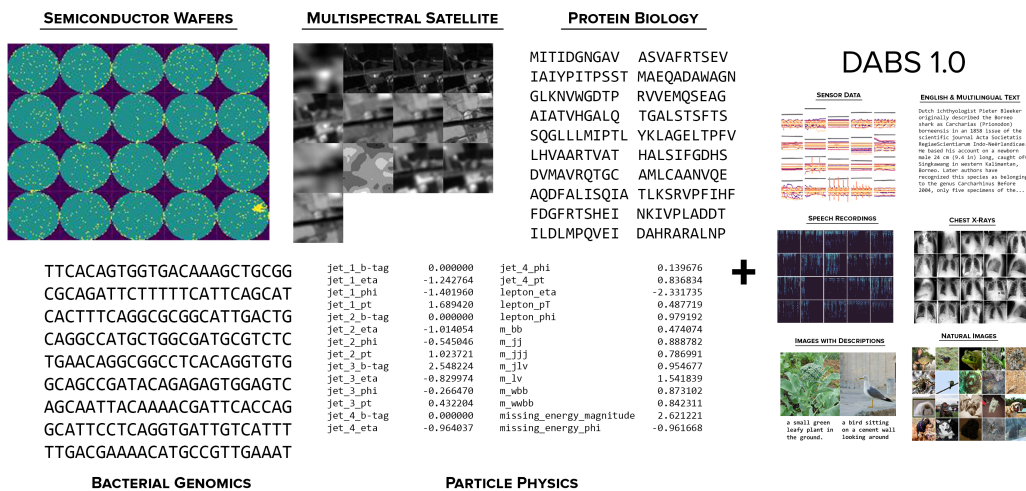

Figure 1: **Left: The five new domains in DABS 2.0.** From left to right, then top to bottom: Semiconductor wafers, multispectral satellite imagery, protein biology, bacterial genomics, particle physics. Examples taken from the pretraining dataset of each domain. 20 wafer examples are shown for semiconductors, a single input is shown for all other examples. Satellite imagery shows all 13 channels of a single multispectral image. See Section 2 for more information about each of the new domains. **Right: The seven original domains from DABS 1.0** that we also train and evaluate on. From left to right, then top to bottom: Wearable Sensors, English Text and Multilingual Text, Speech Recordings, Chest X-rays, Paried Image + Text, Natural Images.

scratch) or lack of defect. We pretrain on the 638,597 unlabeled examples from the WM-811K dataset. For transfer accuracy, we evaluate on the remaining 172,950 labeled wafers from WM-811K. The data for each wafer map is a 2D array of scalars where 0 represents the background of the wafer, 1 represents dice (semiconducting materials) that are not defective, and 2 represents dice that are defective [74]. To prepare the input for the model, we convert the 0,1,2 representation into grayscale pixels (black, 50% grey, and white) to produce a two-dimensional image.

**Particle Physics** High energy physics, also known as particle physics, is one of a growing number of scientific communities using deep learning to gather insights from their data. These datasets are often tabular in nature, and have the potential to contain millions of examples due to the large-scale nature of these experiments. We pretrain on a randomly selected 9.9M instances from the HIGGS dataset [7], a particle physics benchmark containing 21 kinematic properties, and 7 functions of these kinematic properties, for 11M Monte Carlo simulations of particle collisions. The task is to distinguish between particle collision simulations generated by a *signal process*, involving a Higgs boson, from a *background process* that produces the same resulting particles but that does not involve a Higgs boson. We evaluate transfer on the remaining 1.1M instances of the HIGGS dataset.

**Protein Biology** Protein databases have increased exponentially in size over the past several years [15], with much of this data lacking additional human annotations. At the same time, recent advances have shown SSL to be a powerful tool for extracting knowledge from unlabeled protein sequences [50]. To determine the success of domain-agnostic approaches with respect to learning from protein sequences, we pretrain on Pfam [20], a database with 31M protein sequences used commonly in bioinformatics research. We evaluate transfer on several tasks from the TAPE benchmark [50], namely: the Fluorescence [56] dataset, Remote Homology Detection dataset (using the training and validation sets from [36], derived from the SCOP 1.75 database [23] [42]), Secondary Structure Prediction dataset (training and validation sets from [36], with data derived from the Protein DataBank [9]), and the Stability [54] dataset. We tokenize the protein sequences at the amino-acid level to create inputs for the model. These tasks and associated datasets are described in further detail in the TAPE benchmark [50].

**Multispectral Satellite Imagery** While similar in some respects to natural images, satellite imagery differs in that remote sensing instruments may often capture a range of spectral bands beyond the typical RGB colorspaces, including near infrared and shortwave infrared. These additional spectral bands may be useful for a range of environmental or social planning purposes by providing information about land temperatures, soil water content, or correcting for atmospheric effects like clouds or precipitation [29]. However, these bands often have different characteristics from typical RGB images, making certain techniques (e.g. colorspace-based augmentations) inapplicable. To test how domain agnostic SSL algorithms perform on satellite imagery, we pretrain on a randomly selected 24,300 examples from EuroSAT [29], a dataset constructed from Sentinel-2 satellite images covering 13 spectral bands. We evaluate transfer on the remaining 2,700 examples from EuroSAT.

**Existing DABS 1.0 Domains** These domains join the seven existing domains from the original DABS paper: Natural Images, Speech Recordings, English Text, Multilingual Text, Wearable Sensors, Chest X-Rays, Paired Images and Text (Figure 1, right), bringing the total number of domains in the benchmark to twelve. See the original DABS paper [62] for more information about each of these domains. In the following sections we train models for all twelve domains.

### 3 Algorithms

The original DABS paper [62] presented the first universal SSL algorithms evaluated across seven different pretraining datasets. Here, we present two additional domain-agnostic algorithms and evaluate their performance on the new full suite of 12 DABS domains. For all algorithms, we leverage the same Domain Agnostic Transformer approach used in the original DABS paper [62], which uses a set of embedding modules to map inputs to sequences of embeddings (e.g. via token, patch, or segment embeddings) then concatenates them as input to an encoder-only transformer model.

#### 3.1 Generalized Masked Autoencoding

One popular strategy for self-supervised learning is masked sequence modeling, also known as masked autoencoding (MAE). A breakthrough instantiation of this method was BERT [17] in the context of natural language text (although the roots of the idea extend much earlier [70, 45]), and it has recently seen a new wave of adaptation for continuous domains such as audio, images, and video [28, 25, 66, 21].

We generalize the MAE framework to train on all 12 DABS domains as follows: For **tokenized domains** (English and multilingual text, bacterial genomics, and proteins) we predict the missing token with a softmax layer and use the negative log-likelihood loss. For **continuous domains** (natural images, chest x-rays, speech, sensors, semiconductor wafers, particle physics, multispectral satellite imagery) we directly predict the output token and apply a mean-squared error loss. For **multimodal** datasets (image and text) we apply the respective loss to each tokenized or continuous modality within the input.

While this generalization is a straightforward way to evaluate MAE across the DABS domains, we note that it is not without complications. First, the MAE paradigm is somewhat less general than other universal SSL methods because the loss is dependent on the domain of the input (or part of the input). Furthermore, prior work has identified several design choices whose optimal settings appear to differ across tokenized and continuous domains, namely: 1) leveraging additional decoder layers has been shown to be helpful for continuous data, as has 2) entirely dropping the masked tokens from the attention computation [28, 21]. Finally, in this work we consider only linear evaluation, while masked sequence models have typically shown greater performance than competing methods when finetuned.

These complexities aside, the strength and generality of MAE merits its study as a domain-agnostic method, and future work can explore the relative tradeoffs of each of these design choices in a domain-agnostic context.

#### 3.2 Capri: A Hybrid Masked-Contrastive Algorithm

Given the slight additional complexities of the MAE paradigm, we explore an algorithm that attempts to blend the strengths of contrastive learning [27, 19] and MAE, and which does not require a different

|       |     | Cap         | Gen         | Med         | Nat         | Par         | Pro         | Sat         | Sem         | Sen         | Spe         | Tex         | Mul         |
|-------|-----|-------------|-------------|-------------|-------------|-------------|-------------|-------------|-------------|-------------|-------------|-------------|-------------|
| None  |     | 50.1        | 22.4        | 68.1        | 10.1        | 54.8        | 29.9        | 62.3        | 77.7        | 69.8        | 24.9        | 42.3        | 58.1        |
| ShED  | 15% | <b>52.3</b> | 25.6        | 69.8        | 16.1        | 68.0        | <b>36.8</b> | 57.8        | 92.4        | 85.2        | <b>42.1</b> | <b>46.6</b> | 57.5        |
|       | 50% | 50.7        | 17.1        | 70.6        | 19.4        | 67.2        | 35.9        | 55.2        | 92.3        | 65.2        | 29.1        | 45.3        | <b>64.0</b> |
|       | 85% | 51.5        | 19.8        | <b>73.2</b> | <b>24.6</b> | 60.3        | 29.9        | 61.5        | 91.4        | 85.0        | 37.6        | 44.3        | 48.2        |
| Capri | 15% | 51.6        | 19.2        | 70.0        | 21.0        | DV          | 23.5        | 11.1        | 91.2        | DV          | 28.9        | 42.1        | 57.6        |
|       | 50% | 50.7        | 22.6        | 70.4        | 19.6        | DV          | 19.5        | 67.4        | 91.8        | DV          | 22.3        | 42.8        | 57.6        |
|       | 85% | 51.4        | 16.7        | 52.4        | 21.3        | DV          | 18.0        | 63.3        | 92.5        | DV          | 21.7        | 40.2        | 57.5        |
| MAE   | 15% | 51.4        | 26.6        | 71.3        | 19.8        | 68.7        | 32.2        | 84.1        | 93.0        | <b>85.3</b> | 25.6        | 44.3        | OM          |
|       | 50% | 50.2        | <b>39.0</b> | 70.8        | 19.4        | <b>70.0</b> | 30.9        | <b>86.3</b> | 92.9        | 82.5        | 27.2        | 43.9        | OM          |
|       | 85% | 50.0        | 25.7        | 70.6        | 22.4        | 63.5        | 24.2        | 84.8        | <b>93.9</b> | 77.6        | 29.4        | OM          | OM          |

Table 1: Average of transfer metrics for different corruption fractions. Runs marked with “DV” indicate cases where training diverged. “OM” indicates cases where the large vocabulary size of the model produced an an out-of-memory error for the given batch size. **Legend:** Cap: Captioned Images, Gen: Genomics, Med: Medical Images, Nat: Natural Images, Par: Particle Physics, Pro: Protein Biology, Sat: Satellite Images, Sem: Semiconductor Wafers, Sen: Wearable Sensors, Spe: Speech Recordings, Tex: English Text, Mul: Multilingual Text

output format per modality. Intuitively, the algorithm predicts the embeddings of a masked sequence with a contrastive loss, using the other embeddings in the sequence as negative examples. We call this algorithm *contrastive prediction of redacted embeddings*, or **Capri** for short.

Concretely, given a set of input tokens  $x = \{x_0, \dots, x_k\}$  as input to the transformer, we create a masked  $\tilde{x} = \{\tilde{x}_0, \dots, \tilde{x}_k\}$  where  $\tilde{x}_i = x_i$  with probability  $1 - p$  and equals the zero vector  $\vec{0}$  otherwise. The transformer then generates predicted embeddings  $\hat{x} = \{\hat{x}_0, \dots, \hat{x}_k\}$  and the loss for each masked token  $x_i$  is computed as:

$$\mathcal{L}(x_i) = \frac{\exp(\text{cosine-similarity}(\hat{x}_i, x_i)/\tau)}{\sum_j \exp(\text{cosine-similarity}(\hat{x}_i, x_j)/\tau)} \quad (1)$$

where  $\text{cosine-similarity}(x, y) = \frac{x \cdot y}{\|x\|_2 \cdot \|y\|_2}$ , the dot product of two normalized vectors, and  $\tau$  (set to 0.07 in our experiments) controls the temperature of the softmax.

Capri can be seen as a bidirectional masked variant of contrastive predictive coding [68], and instantiations of this approach have been applied to specific modalities such as vision [67] and audio [78]. We apply this SSL framework across the 12 DABS domains, including the multimodal text-image domain, exploring its approach as a domain-agnostic SSL method.

### 3.3 Shuffled Embedding Detection (ShED)

Finally, we also evaluate ShED [62], a shuffled embedding detection algorithm which permutes a subset of the embeddings for an input (prior to adding position embeddings) and trains a classifier to predict which embeddings were perturbed. See [62] for more details about ShED. For simplicity we do not consider the eMix algorithm from the original DABS paper [62].

## 4 Investigating the Optimal Corruption Rate Across Algorithms and Domains

One similarity of each algorithm discussed in Section 3 is that each applies a corruption transformation to a fraction of the input embeddings: ShED permutes a fraction of the embeddings, while MAE and Capri mask out a given fraction. The choice of this fraction (which we will term the *corruption rate*) determines the difficulty of the self-supervised task. If the corruption rate is too small, the task will be too easy and the model will learn slowly. Too large, and the model may not be able to learn from the resulting example.

Several works have studied the impact of the corruption rate on MAE-type models, including in text [71], images [28], and videos [21]. The outcomes of these studies seem to suggest that the optimal masking rate is highly dependent on the domain: text for example appears to require a lower masking fraction than images and especially video.

One hypothesis for this diversity might be termed the *redundancy hypothesis* [28]: that domains vary in the amount of redundant information they contain across parts of the input. For example, images may have more redundant structure across spatial patches than text does across tokens—patches of sky tend to be near other patches of sky—while words are typically rarely repeated several times in a row in written text. Thus, inputs with more redundant structure require larger corruption rates to make the task challenging enough. However, it is difficult to answer these kinds of data-dependent questions when studying self-supervised learning across only  $N = 3$  domains, each in a separate study with different experimental settings.

To demonstrate the utility of DABS for exploring these questions, we conduct a large-scale study of optimal corruption rates across all twelve domains and three algorithms. Despite requiring over 500 runs across 57 datasets, this study is simple to carry out with the DABS codebase, requiring only several commands of the following form which perform the requisite pretraining and transfer runs on the provided device:

```
python3 -m scripts.train_single_domain \
  --domain=genomics \
  --algorithm=mae \
  --corruption_frac=0.5
```

We reuse the experimental settings and hyperparameters from the original DABS paper: We use a Transformer [69] with 12 layers, hidden size 256, 8 attention heads, and dropout with 0.1 probability. Inputs are mapped to a sequence of embeddings using a small set of embedding modules (patch/segment embeddings for continuous data, and token embeddings for tokenized data). We train 100k steps for pretraining and 100 epochs of linear evaluation transfer, where we train a linear classifier on top of the frozen pretrained model. We use the AdamW optimizer [40] with learning weight and weight decay both set to  $1e-4$ . The one change we make from the original DABS paper is that we truncate long transfer runs at 100k steps, as several of the DABS 2.0 transfer datasets are quite large. See the original DABS paper [62] or the DABS codebase<sup>2</sup> for more thorough experimental settings and details.

## 5 Results

The results of these experiments are summarized in Table 1, which shows the average validation metric across transfer datasets for the given pretraining algorithm, domain, and corruption rate.

**Takeaways** Overall across all 12 domains, we see at least one algorithm, and often two or all three, showing clear gains from pretraining. In particular, both MAE and ShED show gains from pretraining in almost all cases, demonstrating their promise as general SSL approaches. There are some clear trends within a domain: for example, MAE significantly outperforms the other methods on multispectral satellite imagery, while ShED proves superior on protein data. MAE also exhibits a limitation for tokenized datasets: large vocabulary sizes and larger masking fractions can cause out-of-memory error due to the cost of the softmax operation (“OM” in Table 1). Capri appears to generally perform worse than ShED and MAE, and its training diverges on certain datasets (“DV” in Table 1). Despite the strong performance of MAE and ShED, there does not appear to be a clear pattern that would enable choosing the optimal algorithm and corruption rate *a priori*. An automated way of determining this rate may be a promising direction for future work.

**Contextualizing the performance of MAE** While MAE performs strongly in some domains (e.g. especially in satellite imagery), it is important to reemphasize differences in our experimental setup to previous work on MAE in text [17], image [28], and video [21] datasets. First, the benefits of MAE have been shown to be strongest in the finetuning setting, rather than the linear evaluation setting. Second, in continuous domains such as images and videos, MAE-trained models are improved upon with the use of additional decoder layers on top of the encoder backbone. Finally, in continuous settings, MAE-trained models have been shown to perform better (and are far more efficient) when the masked tokens are dropped from the transformer computation entirely, rather than merely masked out.

---

<sup>2</sup><http://github.com/alexamkin/dabs>

## 6 Related work

Here we discuss several streams of work related to the contributions in DABS 2.0. See the original DABS paper [62] for a more comprehensive discussion of work on self-supervised learning (SSL) and domain-agnostic methods, Section 3 for discussions of prior work related to the algorithms explored in this work, and [8, 22, 10, 61] for broader perspectives on these trends.

**Self-supervised learning for science and engineering** Several bodies of work attempt to apply self-supervised learning to science and engineering tasks. For example, works have applied SSL to proteins [51], RNA [12], organic molecules [55], wearable sensors [65], multispectral satellite imagery [41], semiconductor manufacturing [33], medical data [80, 60, 26] and high energy physics [18], among many others. These domains make for promising sites to apply SSL methods because many scientific instruments regularly produce large amounts of data, but it is often expensive to hire domain experts to annotate this data for supervised machine learning. The inclusion of the DABS 2.0 domains in the benchmark is intended to drive progress in generalizable SSL algorithms which could benefit all of these fields, including ones where good techniques for SSL are not yet known.

**Scientific investigations of pretraining and transfer** Several works systematically study the various factors influencing pretraining or transfer, either as a way to improve the performance of models or solely to attain a better scientific understanding of the self-supervised learning process. For example, several works vary the pretraining data distribution [11], difficulty of the pretraining task [71], pretraining hyperparameters [39], or choice of pretraining algorithm [34]. Other works focus more on the interface between pretraining and transfer, exploring what kinds of dataset shifts influence the success of transfer [35, 16, 75], which parts of the network matter most for transfer [76, 48, 64], or how the choice of transfer method influences the accuracy [79, 72], efficiency [52, 58, 37] or robustness [73, 30, 63] of the resulting model.

## 7 Discussion

### 7.1 Experimental Scope and Limitations

The past year has seen vigorous discussion about the relationship between benchmarks in machine learning and their connection to real world goals and problems [57, 46, 49]. Here, we discuss several of these concerns in connection to the DABS 2.0 benchmark, especially given its focus on real-world science and engineering datasets curated by domain experts. We discuss several concerns through the lenses of *internal* and *external validity* [38]:

**Internal validity** concerns the experimental procedures conducted within a specific benchmark. DABS attempts to reduce as much possible experimental variation by providing an easy-to-use codebase with easy-to-modify baseline algorithms and standardized preprocessing of datasets. However, one unresolved challenge here is choosing good hyperparameters for our corruption fraction experiments. This issue has been shown to be subtle and challenging for a single algorithm applied to a single dataset within a domain [13], and only compounds when expanding to multiple domains and algorithms. In addition, groups with a larger budget for hyperparameter search may see larger gains for a given algorithm than a less well-resourced organization would, making it challenging to fairly compare algorithms.

**External validity** refers to the degree to which experimental insights have relevance to the rest of the real world. We discuss two major sub-challenges here: First, *construct validity* [44] asks whether a particular metric used in a research study corresponds to the actual task or behavior of interest. In particular, [49] question whether datasets that seek to measure “general” capabilities in a particular domain (e.g. language understanding or visual understanding) faithfully realize that goal. We agree that strong claims such as generality require strong evidence, and for this reason the DABS benchmark does not take the position that the datasets in each domain represent “general” capabilities. However, they do represent a range of possible downstream tasks in each domain, and can measure how methods might perform on similar tasks. While this task distribution may not cover the full space of possible tasks one might like to address, the DABS 2.0 domains were chosen because they were constructed by domain experts to target problems with real-world importance. Self-supervised

learning methods that help domain experts achieve better performance on tasks that are important to them may provide real-world value independent of any abstract claims of generality.

A second external validity concern is that of *ecological validity*, also referred to as *mundane realism* [24]. This notion refers to whether the results of a scientific study generalize to the real world. While we have discussed the individual DABS domains, the goal of the DABS benchmark is to understand the behavior of SSL across domains and produce algorithms that generalize to new domains. The DABS 2.0 domains were chosen because they reflect the settings that are especially promising for SSL—data-rich but label-scarce settings with significant potential for scientific impact. One potential challenge is that a user of the benchmark could attempt to hardcode an “if statement” of domain-specific algorithms in an attempt to game the system, but the solution would be unlikely to be adopted by the community as it would not generalize, and would fail when new domains (e.g. the DABS 2.0 tasks) are introduced to the benchmark. Another limitation is that 12 domains is still a small number compared to the vast array of domains in the world, and the DABS benchmark does not yet have coverage for several important modalities, such as point clouds and graphs. However, it is surely an improvement over studying two or three domains, as is common practice, and provides a template for continued expansion into new domains.

## 7.2 Societal Impact

It is challenging to forecast the impacts of domain-agnostic SSL due to the wide-ranging fields it could be applied to. In DABS 2.0, we aim to introduce science and engineering domains where advances in these fields could lead to the development of improved medicines, more affordable electronics, or sustainable development. By the same token, however, advances in each field—whether due to DABS or other sources of scientific progress—could enable malicious users to cause harm. Technology does not exist in a vacuum, and effective governance frameworks and professional norms are important to ensure positive outcomes from technological progress. In this work, we also aimed to model how DABS could be used for systematic evaluation and understanding of SSL algorithms across a range of possible pretraining and transfer datasets. A broad coverage of different domains could help users of the benchmark identify failure modes of existing systems. For more discussion of societal impacts of domain-agnostic SSL, see the original DABS paper [62].

## 7.3 Future Work

We see ample opportunity for future work with DABS. Most directly, DABS enables the testing and development of improved SSL algorithms that perform better across the 12 domains in the benchmark. Another important line of work is in scaling existing algorithms to larger models and compute budgets, to see how close existing algorithms fare to state-of-the-art models typically trained on far more data. Finally, we have demonstrated in this paper the utility of DABS for easily conducting experiments for various experimental parameters (e.g. the corruption fraction), drawing scientific insights about the benefits and tradeoffs of different SSL algorithms. Our exploration has only barely scratched the surface of this kind of analysis, which remains ripe for future study.

## 8 Conclusion

We introduce DABS 2.0, augmenting the DABS benchmark for universal self-supervision with 5 additional science and engineering domains, two new algorithms, and the widest exploration of SSL yet across 12 domains and different corruption fractions. We hope this demonstrates the utility of DABS for easily creating and evaluating new SSL algorithms for the real-world settings where they may have the most positive impact.

## Acknowledgments and Disclosure of Funding

We would like to thank Shyamal Buch and Alex Ku for useful discussions and feedback. AT is supported by an Open Phil AI Fellowship.



## References

- [1] TensorFlow Datasets, a collection of ready-to-use datasets. <https://www.tensorflow.org/datasets>.
- [2] EE Abola, FC Bernstein, SH Bryant, TF Koetzle, and J Weng. Crystallographic databases-information content. *Software Systems, Scientific Applications*, 107, 1987.
- [3] Hassan Akbari, Linagzhe Yuan, Rui Qian, Wei-Hong Chuang, Shih-Fu Chang, Yin Cui, and Boqing Gong. Vatt: Transformers for multimodal self-supervised learning from raw video, audio and text. In *NeurIPS*, 2021.
- [4] Jean-Baptiste Alayrac, Jeff Donahue, Pauline Luc, Antoine Miech, Iain Barr, Yana Hasson, Karel Lenc, Arthur Mensch, Katie Millican, Malcolm Reynolds, Roman Ring, Eliza Rutherford, Serkan Cabi, Tengda Han, Zhitao Gong, Sina Samangooei, Marianne Monteiro, Jacob Menick, Sebastian Borgeaud, Andy Brock, Aida Nematzadeh, Sahand Sharifzadeh, Mikolaj Binkowski, Ricardo Barreira, Oriol Vinyals, Andrew Zisserman, and Karen Simonyan. Flamingo: a visual language model for few-shot learning. *ArXiv*, abs/2204.14198, 2022.
- [5] Johan Alwall, Michel Herquet, Fabio Maltoni, Olivier Mattelaer, and Tim Stelzer. Madgraph 5: going beyond. *Journal of High Energy Physics*, 2011(6):1–40, 2011.
- [6] Alexei Baevski, Wei-Ning Hsu, Qiantong Xu, Arun Babu, Jiatao Gu, and Michael Auli. data2vec: A general framework for self-supervised learning in speech, vision and language. *ArXiv*, abs/2202.03555, 2022.
- [7] Pierre Baldi, Peter Sadowski, and Daniel Whiteson. Searching for exotic particles in high-energy physics with deep learning. *Nature communications*, 5(1):1–9, 2014.
- [8] Emily M. Bender, Timnit Gebru, Angelina McMillan-Major, and Shmargaret Shmitchell. On the dangers of stochastic parrots: Can language models be too big? *Proceedings of the 2021 ACM Conference on Fairness, Accountability, and Transparency*, 2021.
- [9] Helen M Berman, John Westbrook, Zukang Feng, Gary Gilliland, Talapady N Bhat, Helge Weissig, Ilya N Shindyalov, and Philip E Bourne. The protein data bank. *Nucleic acids research*, 28(1):235–242, 2000.
- [10] Rishi Bommasani, Drew A. Hudson, Ehsan Adeli, Russ Altman, Simran Arora, Sydney von Arx, Michael S. Bernstein, Jeannette Bohg, Antoine Bosselut, Emma Brunskill, Erik Brynjolfsson, S. Buch, Dallas Card, Rodrigo Castellon, Niladri S. Chatterji, Annie S. Chen, Kathleen A. Creel, Jared Davis, Dora Demszky, Chris Donahue, Moussa Doumbouya, Esin Durmus, Stefano Ermon, John Etchemendy, Kawin Ethayarajh, Li Fei-Fei, Chelsea Finn, Trevor Gale, Lauren E. Gillespie, Karan Goel, Noah D. Goodman, Shelby Grossman, Neel Guha, Tatsunori Hashimoto, Peter Henderson, John Hewitt, Daniel E. Ho, Jenny Hong, Kyle Hsu, Jing Huang, Thomas F. Icard, Saahil Jain, Dan Jurafsky, Pratyusha Kalluri, Siddharth Karamcheti, Geoff Keeling, Fereshte Khani, O. Khattab, Pang Wei Koh, Mark S. Krass, Ranjay Krishna, Rohith Kuditipudi, Ananya Kumar, Faisal Ladhak, Mina Lee, Tony Lee, Jure Leskovec, Isabelle Levent, Xiang Lisa Li, Xuechen Li, Tengyu Ma, Ali Malik, Christopher D. Manning, Suvir P. Mirchandani, Eric Mitchell, Zanele Munyikwa, Suraj Nair, Avaniika Narayan, Deepak Narayanan, Benjamin Newman, Allen Nie, Juan Carlos Niebles, Hamed Nilforoshan, J. F. Nyarko, Giray Ogut, Laurel Orr, Isabel Papadimitriou, Joon Sung Park, Chris Piech, Eva Portelance, Christopher Potts, Aditi Raghunathan, Robert Reich, Hongyu Ren, Frieda Rong, Yusuf H. Roohani, Camilo Ruiz, Jack Ryan, Christopher R’e, Dorsa Sadigh, Shiori Sagawa, Keshav Santhanam, Andy Shih, Krishna Parasuram Srinivasan, Alex Tamkin, Rohan Taori, Armin W. Thomas, Florian Tramèr, Rose E. Wang, William Wang, Bohan Wu, Jiajun Wu, Yuhuai Wu, Sang Michael Xie, Michihiro Yasunaga, Jiaxuan You, Matei A. Zaharia, Michael Zhang, Tianyi Zhang, Xikun Zhang, Yuhui Zhang, Lucia Zheng, Kaitlyn Zhou, and Percy Liang. On the opportunities and risks of foundation models. *ArXiv*, abs/2108.07258, 2021.
- [11] Stephanie C. Y. Chan, Adam Santoro, Andrew Kyle Lampinen, Jane X. Wang, Aaditya Singh, Pierre H. Richemond, Jay McClelland, and Felix Hill. Data distributional properties drive emergent in-context learning in transformers. *ArXiv*, abs/2205.05055, 2022.

- [12] Liang Chen, Yuyao Zhai, Qiuyan He, Weinan Wang, and Minghua Deng. Integrating deep supervised, self-supervised and unsupervised learning for single-cell rna-seq clustering and annotation. *Genes*, 11, 2020.
- [13] Dami Choi, Christopher J. Shallue, Zachary Nado, Jaehoon Lee, Chris J. Maddison, and George E. Dahl. On empirical comparisons of optimizers for deep learning. *ArXiv*, abs/1910.05446, 2019.
- [14] Aakanksha Chowdhery, Sharan Narang, Jacob Devlin, Maarten Bosma, Gaurav Mishra, Adam Roberts, Paul Barham, Hyung Won Chung, Charles Sutton, Sebastian Gehrmann, Parker Schuh, Kensen Shi, Sasha Tsvyashchenko, Joshua Maynez, Abhishek Baidoor Rao, Parker Barnes, Yi Tay, Noam M. Shazeer, Vinodkumar Prabhakaran, Emily Reif, Nan Du, Benton C. Hutchinson, Reiner Pope, James Bradbury, Jacob Austin, Michael Isard, Guy Gur-Ari, Pengcheng Yin, Toju Duke, Anselm Levskaya, Sanjay Ghemawat, Sunipa Dev, Henryk Michalewski, Xavier García, Vedant Misra, Kevin Robinson, Liam Fedus, Denny Zhou, Daphne Ippolito, David Luan, Hyeontaek Lim, Barret Zoph, Alexander Spiridonov, Ryan Sepassi, David Dohan, Shivani Agrawal, Mark Omernick, Andrew M. Dai, Thanumalayan Sankaranarayana Pillai, Marie Pellat, Aitor Lewkowycz, Erica Oliveira Moreira, Rewon Child, Oleksandr Polozov, Katherine Lee, Zongwei Zhou, Xuezhi Wang, Brennan Saeta, Mark Diaz, Orhan Firat, Michele Catasta, Jason Wei, Kathleen S. Meier-Hellstern, Douglas Eck, Jeff Dean, Slav Petrov, and Noah Fiedel. Palm: Scaling language modeling with pathways. *ArXiv*, abs/2204.02311, 2022.
- [15] UniProt Consortium. Uniprot: a worldwide hub of protein knowledge. *Nucleic acids research*, 47(D1):D506–D515, 2019.
- [16] Ameet Deshpande, Partha Talukdar, and Karthik Narasimhan. When is bert multilingual? isolating crucial ingredients for cross-lingual transfer. *arXiv preprint arXiv:2110.14782*, 2021.
- [17] Jacob Devlin, Ming-Wei Chang, Kenton Lee, and Kristina Toutanova. Bert: Pre-training of deep bidirectional transformers for language understanding. *ArXiv*, abs/1810.04805, 2019.
- [18] Barry M Dillon, Gregor Kasieczka, Hans Orlschlager, Tilman Plehn, Peter Sorrenson, and Lorenz Vogel. Symmetries, safety, and self-supervision. *arXiv preprint arXiv:2108.04253*, 2021.
- [19] Alexey Dosovitskiy, Jost Tobias Springenberg, Martin A. Riedmiller, and Thomas Brox. Discriminative unsupervised feature learning with convolutional neural networks. In *NIPS*, 2014.
- [20] Sara El-Gebali, Jaina Mistry, Alex Bateman, Sean R Eddy, Aurélien Luciani, Simon C Potter, Matloob Qureshi, Lorna J Richardson, Gustavo A Salazar, Alfredo Smart, Erik L L Sonnhammer, Layla Hirsh, Lisanna Paladin, Damiano Piovesan, Silvio C E Tosatto, and Robert D Finn. The Pfam protein families database in 2019. *Nucleic Acids Research*, 47(D1):D427–D432, 2019.
- [21] Christoph Feichtenhofer, Haoqi Fan, Yanghao Li, and Kaiming He. Masked autoencoders as spatiotemporal learners. *ArXiv*, abs/2205.09113, 2022.
- [22] Nic Fishman and Leif Hancox-Li. Should attention be all we need? the epistemic and ethical implications of unification in machine learning. *ArXiv*, abs/2205.08377, 2022.
- [23] Naomi K Fox, Steven E Brenner, and John-Marc Chandonia. Scope: Structural classification of proteins—extended, integrating scop and astral data and classification of new structures. *Nucleic acids research*, 42(D1):D304–D309, 2013.
- [24] Kenneth J Gergen. Experimentation in social psychology: A reappraisal. *European Journal of Social Psychology*, 8(4):507–527, 1978.
- [25] Yuan Gong, Cheng-I Lai, Yu-An Chung, and James R. Glass. Ssast: Self-supervised audio spectrogram transformer. *ArXiv*, abs/2110.09784, 2021.
- [26] Bryan Gopal, Ryan Han, Gautham Raghupathi, Andrew Y. Ng, Geoffrey H. Tison, and Pranav Rajpurkar. 3kg: Contrastive learning of 12-lead electrocardiograms using physiologically-inspired augmentations. In *MLAH@NeurIPS*, 2021.

- [27] Raia Hadsell, Sumit Chopra, and Yann LeCun. Dimensionality reduction by learning an invariant mapping. *2006 IEEE Computer Society Conference on Computer Vision and Pattern Recognition (CVPR'06)*, 2:1735–1742, 2006.
- [28] Kaiming He, Xinlei Chen, Saining Xie, Yanghao Li, Piotr Doll'ar, and Ross B. Girshick. Masked autoencoders are scalable vision learners. *ArXiv*, abs/2111.06377, 2021.
- [29] Patrick Helber, Benjamin Bischke, Andreas Dengel, and Damian Borth. Eurosat: A novel dataset and deep learning benchmark for land use and land cover classification. *IEEE Journal of Selected Topics in Applied Earth Observations and Remote Sensing*, 12(7):2217–2226, 2019.
- [30] John Hewitt, Xiang Lisa Li, Sang Michael Xie, Benjamin Newman, and Percy Liang. Ensembles and cocktails: Robust finetuning for natural language generation. In *NeurIPS 2021 Workshop on Distribution Shifts: Connecting Methods and Applications*, 2021.
- [31] Jordan Hoffmann, Sebastian Borgeaud, Arthur Mensch, Elena Buchatskaya, Trevor Cai, Eliza Rutherford, Diego de Las Casas, Lisa Anne Hendricks, Johannes Welbl, Aidan Clark, Tom Hennigan, Eric Noland, Katie Millican, George van den Driessche, Bogdan Damoc, Aurelia Guy, Simon Osindero, Karen Simonyan, Erich Elsen, Jack W. Rae, Oriol Vinyals, and L. Sifre. Training compute-optimal large language models. *ArXiv*, abs/2203.15556, 2022.
- [32] Jie Hou, Badri Adhikari, and Jianlin Cheng. Deepssf: deep convolutional neural network for mapping protein sequences to folds. *Bioinformatics*, 34(8):1295–1303, 2018.
- [33] Hyungu Kahng and Seoung Bum Kim. Self-supervised representation learning for wafer bin map defect pattern classification. *IEEE Transactions on Semiconductor Manufacturing*, 34:74–86, 2021.
- [34] Ananya Karthik, Mike Wu, Noah Goodman, and Alex Tamkin. Tradeoffs between contrastive and supervised learning: An empirical study. *arXiv preprint arXiv:2112.05340*, 2021.
- [35] Alexander Ke, William Ellsworth, Oishi Banerjee, A. Ng, and Pranav Rajpurkar. Chextransfer: performance and parameter efficiency of imagenet models for chest x-ray interpretation. *Proceedings of the Conference on Health, Inference, and Learning*, 2021.
- [36] Michael Schantz Klausen, Martin Closter Jespersen, Henrik Nielsen, Kamilla Kjaergaard Jensen, Vanessa Isabell Jurtz, Casper Kaae Soenderby, Morten Otto Alexander Sommer, Ole Winther, Morten Nielsen, Bent Petersen, et al. Netsurfp-2.0: Improved prediction of protein structural features by integrated deep learning. *Proteins: Structure, Function, and Bioinformatics*, 2019.
- [37] Xiang Lisa Li and Percy Liang. Prefix-tuning: Optimizing continuous prompts for generation. *Proceedings of the 59th Annual Meeting of the Association for Computational Linguistics and the 11th International Joint Conference on Natural Language Processing (Volume 1: Long Papers)*, abs/2101.00190, 2021.
- [38] Thomas Liao, Rohan Taori, Inioluwa Deborah Raji, and Ludwig Schmidt. Are we learning yet? a meta review of evaluation failures across machine learning. In *Thirty-fifth Conference on Neural Information Processing Systems Datasets and Benchmarks Track (Round 2)*, 2021.
- [39] Yinhan Liu, Myle Ott, Naman Goyal, Jingfei Du, Mandar Joshi, Danqi Chen, Omer Levy, Mike Lewis, Luke Zettlemoyer, and Veselin Stoyanov. Roberta: A robustly optimized bert pretraining approach. *ArXiv*, abs/1907.11692, 2019.
- [40] Ilya Loshchilov and Frank Hutter. Decoupled weight decay regularization. In *ICLR*, 2019.
- [41] Oscar Mañas, Alexandre Lacoste, Xavier Giró i Nieto, David Vázquez, and Pau Rodríguez López. Seasonal contrast: Unsupervised pre-training from uncurated remote sensing data. *2021 IEEE/CVF International Conference on Computer Vision (ICCV)*, pages 9394–9403, 2021.
- [42] Alexey G Murzin, Steven E Brenner, Tim Hubbard, and Cyrus Chothia. Scop: a structural classification of proteins database for the investigation of sequences and structures. *Journal of molecular biology*, 247(4):536–540, 1995.

- [43] Séverine Ovin, Xavier Rouby, and Vincent Lemaitre. Delphes, a framework for fast simulation of a generic collider experiment. *arXiv preprint arXiv:0903.2225*, 2009.
- [44] Scott W. O’Leary-Kelly and Robert J. Vokurka. The empirical assessment of construct validity. *Journal of Operations Management*, 16:387–405, 1998.
- [45] Deepak Pathak, Philipp Krähenbühl, Jeff Donahue, Trevor Darrell, and Alexei A. Efros. Context encoders: Feature learning by inpainting. *2016 IEEE Conference on Computer Vision and Pattern Recognition (CVPR)*, pages 2536–2544, 2016.
- [46] Amandalynne Paullada, Inioluwa Deborah Raji, Emily M. Bender, Emily L. Denton, and A. Hanna. Data and its (dis)contents: A survey of dataset development and use in machine learning research. *Patterns*, 2, 2021.
- [47] Marco Punta, Penny C Coggill, Ruth Y Eberhardt, Jaina Mistry, John Tate, Chris Bournsnel, Ningze Pang, Kristoffer Forslund, Goran Ceric, Jody Clements, et al. The pfam protein families database. *Nucleic acids research*, 40(D1):D290–D301, 2012.
- [48] Maithra Raghu, Chiyuan Zhang, Jon Kleinberg, and Samy Bengio. Transfusion: Understanding transfer learning for medical imaging. *Advances in neural information processing systems*, 32, 2019.
- [49] Inioluwa Deborah Raji, Emily M. Bender, Amandalynne Paullada, Emily L. Denton, and A. Hanna. Ai and the everything in the whole wide world benchmark. *ArXiv*, abs/2111.15366, 2021.
- [50] Roshan Rao, Nicholas Bhattacharya, Neil Thomas, Yan Duan, Xi Chen, John Canny, Pieter Abbeel, and Yun S Song. Evaluating protein transfer learning with tape. In *Advances in Neural Information Processing Systems*, 2019.
- [51] Roshan Rao, Nicholas Bhattacharya, Neil Thomas, Yan Duan, Xi Chen, John F. Canny, P. Abbeel, and Yun S. Song. Evaluating protein transfer learning with tape. *bioRxiv*, 2019.
- [52] Sylvestre-Alvise Rebuffi, Hakan Bilen, and Andrea Vedaldi. Learning multiple visual domains with residual adapters. In *NIPS*, 2017.
- [53] Jie Ren, Peter J Liu, Emily Fertig, Jasper Snoek, Ryan Poplin, Mark Depristo, Joshua Dillon, and Balaji Lakshminarayanan. Likelihood ratios for out-of-distribution detection. *Advances in Neural Information Processing Systems*, 32, 2019.
- [54] Gabriel J Rocklin, Tamuka M Chidyausiku, Inna Goreshnik, Alex Ford, Scott Houliston, Alexander Lemak, Lauren Carter, Rashmi Ravichandran, Vikram K Mulligan, Aaron Chevalier, et al. Global analysis of protein folding using massively parallel design, synthesis, and testing. *Science*, 357(6347):168–175, 2017.
- [55] Daniel Rothchild, Alex Tamkin, Julie H. Yu, Ujval Misra, and Joseph Gonzalez. C5t5: Controllable generation of organic molecules with transformers. *ArXiv*, abs/2108.10307, 2021.
- [56] Karen S Sarkisyan, Dmitry A Bolotin, Margarita V Meer, Dinara R Usmanova, Alexander S Mishin, George V Sharonov, Dmitry N Ivankov, Nina G Bozhanova, Mikhail S Baranov, Onuralp Soylemez, et al. Local fitness landscape of the green fluorescent protein. *Nature*, 533(7603):397, 2016.
- [57] David Schlangen. Targeting the benchmark: On methodology in current natural language processing research. *ArXiv*, abs/2007.04792, 2021.
- [58] Taylor Shin, Yasaman Razeghi, Robert L Logan IV, Eric Wallace, and Sameer Singh. Eliciting knowledge from language models using automatically generated prompts. *ArXiv*, abs/2010.15980, 2020.
- [59] Torbjörn Sjöstrand, Stephen Mrenna, and Peter Skands. Pythia 6.4 physics and manual. *Journal of High Energy Physics*, 2006(05):026, 2006.
- [60] Pratham N. Soni, Siyu Shi, Pranav Sriram, Andrew Y. Ng, and Pranav Rajpurkar. Contrastive learning of heart and lung sounds for label-efficient diagnosis. *Patterns*, 3, 2022.

- [61] Alex Tamkin, Miles Brundage, Jack Clark, and Deep Ganguli. Understanding the capabilities, limitations, and societal impact of large language models. *arXiv preprint arXiv:2102.02503*, 2021.
- [62] Alex Tamkin, Vincent Liu, Rongfei Lu, Daniel Fein, Colin Schultz, and Noah Goodman. Dabs: A domain-agnostic benchmark for self-supervised learning. *arXiv preprint arXiv:2111.12062*, 2021.
- [63] Alex Tamkin, Dat Nguyen, Salil Deshpande, Jesse Mu, and Noah Goodman. Active learning helps pretrained models learn the intended task. *arXiv preprint arXiv:2204.08491*, 2022.
- [64] Alex Tamkin, Trisha Singh, Davide Giovanardi, and Noah D. Goodman. Investigating transferability in pretrained language models. In *FINDINGS*, 2020.
- [65] Alex Tamkin, Mike Wu, and Noah D. Goodman. Viewmaker networks: Learning views for unsupervised representation learning. *ArXiv*, abs/2010.07432, 2021.
- [66] Zhan Tong, Yibing Song, Jue Wang, and Limin Wang. Videomae: Masked autoencoders are data-efficient learners for self-supervised video pre-training. *ArXiv*, abs/2203.12602, 2022.
- [67] Trieu H. Trinh, Minh-Thang Luong, and Quoc V. Le. Selfie: Self-supervised pretraining for image embedding. *ArXiv*, abs/1906.02940, 2019.
- [68] Aäron van den Oord, Yazhe Li, and Oriol Vinyals. Representation learning with contrastive predictive coding. *ArXiv*, abs/1807.03748, 2018.
- [69] Ashish Vaswani, Noam Shazeer, Niki Parmar, Jakob Uszkoreit, Llion Jones, Aidan N Gomez, Łukasz Kaiser, and Illia Polosukhin. Attention is all you need. *Advances in neural information processing systems*, 30, 2017.
- [70] Pascal Vincent, H. Larochelle, Yoshua Bengio, and Pierre-Antoine Manzagol. Extracting and composing robust features with denoising autoencoders. In *ICML '08*, 2008.
- [71] Alexander Wettig, Tianyu Gao, Zexuan Zhong, and Danqi Chen. Should you mask 15% in masked language modeling? *ArXiv*, abs/2202.08005, 2022.
- [72] Mitchell Wortsman, Gabriel Ilharco, Samir Yitzhak Gadre, Rebecca Roelofs, Raphael Gontijo-Lopes, Ari S. Morcos, Hongseok Namkoong, Ali Farhadi, Yair Carmon, Simon Kornblith, and Ludwig Schmidt. Model soups: averaging weights of multiple fine-tuned models improves accuracy without increasing inference time. *ArXiv*, abs/2203.05482, 2022.
- [73] Mitchell Wortsman, Gabriel Ilharco, Mike Li, Jong Wook Kim, Hannaneh Hajishirzi, Ali Farhadi, Hongseok Namkoong, and Ludwig Schmidt. Robust fine-tuning of zero-shot models. *ArXiv*, abs/2109.01903, 2021.
- [74] Ming-Ju Wu, Jyh-Shing R Jang, and Jui-Long Chen. Wafer map failure pattern recognition and similarity ranking for large-scale data sets. *IEEE Transactions on Semiconductor Manufacturing*, 28(1):1–12, 2014.
- [75] Zhengxuan Wu, Isabel Papadimitriou, and Alex Tamkin. Oolong: Investigating what makes crosslingual transfer hard with controlled studies. *ArXiv*, abs/2202.12312, 2022.
- [76] Jason Yosinski, Jeff Clune, Yoshua Bengio, and Hod Lipson. How transferable are features in deep neural networks? *ArXiv*, abs/1411.1792, 2014.
- [77] Jiahui Yu, Zirui Wang, Vijay Vasudevan, Legg Yeung, Mojtaba Seyedhosseini, and Yonghui Wu. Coca: Contrastive captioners are image-text foundation models. *ArXiv*, abs/2205.01917, 2022.
- [78] Rowan Zellers, Jiasen Lu, Ximing Lu, Youngjae Yu, Yanpeng Zhao, Mohammadreza Salehi, Aditya Kusupati, Jack Hessel, Ali Farhadi, and Yejin Choi. Merlot reserve: Neural script knowledge through vision and language and sound. *ArXiv*, abs/2201.02639, 2022.
- [79] Tianyi Zhang, Felix Wu, Arzoo Katiyar, Kilian Q. Weinberger, and Yoav Artzi. Revisiting few-sample bert fine-tuning. *ArXiv*, abs/2006.05987, 2021.

- [80] Yuhao Zhang, Hang Jiang, Yasuhide Miura, Christopher D Manning, and Curtis P Langlotz. Contrastive learning of medical visual representations from paired images and text. *arXiv preprint arXiv:2010.00747*, 2020.

## Checklist

The checklist follows the references. Please read the checklist guidelines carefully for information on how to answer these questions. For each question, change the default **[TODO]** to **[Yes]**, **[No]**, or **[N/A]**. You are strongly encouraged to include a **justification to your answer**, either by referencing the appropriate section of your paper or providing a brief inline description. For example:

- Did you include the license to the code and datasets? **[Yes]** See Appendix A.
- Did you include the license to the code and datasets? **[No]** The code and the data are proprietary.
- Did you include the license to the code and datasets? **[N/A]**

Please do not modify the questions and only use the provided macros for your answers. Note that the Checklist section does not count towards the page limit. In your paper, please delete this instructions block and only keep the Checklist section heading above along with the questions/answers below.

1. For all authors...
  - (a) Do the main claims made in the abstract and introduction accurately reflect the paper’s contributions and scope? **[Yes]**
  - (b) Did you describe the limitations of your work? **[Yes]** In Section 7
  - (c) Did you discuss any potential negative societal impacts of your work? **[Yes]** In Section 7
  - (d) Have you read the ethics review guidelines and ensured that your paper conforms to them? **[Yes]**
2. If you are including theoretical results...
  - (a) Did you state the full set of assumptions of all theoretical results? **[N/A]**
  - (b) Did you include complete proofs of all theoretical results? **[N/A]**
3. If you ran experiments (e.g. for benchmarks)...
  - (a) Did you include the code, data, and instructions needed to reproduce the main experimental results (either in the supplemental material or as a URL)? **[No]** Code will be made available at [github.com/alexamkin/dabs](https://github.com/alexamkin/dabs)
  - (b) Did you specify all the training details (e.g., data splits, hyperparameters, how they were chosen)? **[Yes]** In appendix, and will also be present in the provided code
  - (c) Did you report error bars (e.g., with respect to the random seed after running experiments multiple times)? **[No]** We ran one trial each due to the large number of experiments and computational limitations
  - (d) Did you include the total amount of compute and the type of resources used (e.g., type of GPUs, internal cluster, or cloud provider)? **[Yes]** In the appendix
4. If you are using existing assets (e.g., code, data, models) or curating/releasing new assets...
  - (a) If your work uses existing assets, did you cite the creators? **[Yes]** In Section 2 and the appendix
  - (b) Did you mention the license of the assets? **[Yes]** In the appendix
  - (c) Did you include any new assets either in the supplemental material or as a URL? **[N/A]**
  - (d) Did you discuss whether and how consent was obtained from people whose data you’re using/curating? **[Yes]** In the appendix
  - (e) Did you discuss whether the data you are using/curating contains personally identifiable information or offensive content? **[Yes]** In the appendix.
5. If you used crowdsourcing or conducted research with human subjects...

- (a) Did you include the full text of instructions given to participants and screenshots, if applicable? [N/A]
- (b) Did you describe any potential participant risks, with links to Institutional Review Board (IRB) approvals, if applicable? [N/A]
- (c) Did you include the estimated hourly wage paid to participants and the total amount spent on participant compensation? [N/A]

## A Dataset Licenses

Below we list each dataset’s license, as provided either in the paper proposing the dataset or on the dataset website. For datasets where we were unable to find a license, we list “No License.”

- **Bacterial Genomics:** Genomics OOD Dataset (Apache License, Version 2.0)
- **Semiconductor Wafer Manufacturing:** WM-811K (CC0: Public Domain)
- **Particle Physics:** HIGGS (No License)
- **Protein Biology:** Pfam (CC0: Public Domain), Fluorescence (No License), [32] (No License), SCOP 1.75 (CC-BY 4.0), [36] (No License), Protein DataBank (CC0: Public Domain), Stability (No License)
- **Multispectral Satellite Imagery:** BigEarthNet (Community Data License Agreement – Permissive, Version 1.0<sup>3</sup>), EuroSat (CC0: Public Domain)

## B Origins and Collection of Datasets in DABS 2.0

DABS makes use of a diverse array of kinds of data. Here, we detail to the best of our knowledge how these datasets were collected, including whether consent was explicitly obtained from humans providing the data.

- For WM-811K, Wu et. al [74] note “the [dataset] was built comprising 811,457 wafer maps, in which each wafer map was collected from real-world fabrication. Domain experts were recruited to annotate the pattern type for approximately 20% of the wafer maps in the WM-811K dataset.”
- For HIGGS, Baldi et. al [7] state “simulated events are generated with the MADGRAPH [5] event generator assuming 8 TeV collisions of protons as at the latest run of the Large Hadron Collider, with showering and hadronization performed by PYTHIA [59] and detector response simulated by DELPHES [43]”.
- For Genomics OOD, Rie et. al [53], “downloaded 11,672 bacteria genomes from National Center for Biotechnology Information (NCBI<sup>4</sup>) on September 2018 ... Genomes belonging to new classes that were first discovered between 01/01/2011 and 01/01/2016 are used for generating the validation dataset for OOD. Genomes belonging to the old classes but sequenced and released between 01/01/2011 and 01/01/2016 are used for generating the validation dataset for in-distribution. Similarly, genomes belonging to the new classes that were first discovered after 01/01/2016 are used for generating test dataset for OOD, while genomes belonging to the old classes that were sequenced and released after 01/01/2016 are used for generating the test dataset for in-distribution ... To mimic the real sequencing data, we fragmented genomes in each class into short sequences of length 250 base pairs, which is a common length that the current sequencing technology generates. Among all the short sequences, we randomly choose 100,000 sequences for each class for the training, validation, and test datasets.”
- For the training and validation sets from the DeepSF paper, Hou et. al [32] state, “The main dataset that we used for training, validation and test was downloaded from the SCOP 1.75 genetic domain sequence subsets with less than 95% pairwise identity released in 2009 ... The dataset contains 16 712 proteins covering 7 major structural classes with total 1195 identified folds.”
- For SCOP 1.75, Murzin et. al [42] say the dataset, “includes all proteins in the current version of the PDB [2] and almost all proteins for which structures have been published but whose co-ordinates are not available from the PDB.”
- For Pfam, the data comes from a variety of different sources. Writing about Pfam in 2012, Punta et. al [47] note that the data “will come from a variety of sources, in particular, the Protein Data Bank (PDB) and the analysis of complete proteomes for sequences not matched by Pfam.” In 2019, speaking of how Pfam has evolved from previous iterations, El-Gebali

<sup>3</sup><https://cdla.dev/permissive-1-0/>

<sup>4</sup><https://www.ncbi.nlm.nih.gov/genome/browse#!/prokaryotes/>



et. al [20] state, “new entries have been deposited in Pfam by the RepeatsDB [a database docused on defining repeats in known structures] curators” and “Evolutionary Classification of Protein Domains (ECOD) ... is a hierarchical classification of protein domains based on evolutionary relationships determined from known structures ... new Pfam entries ... have been generated using ECOD.”

- For the training and validation sets from NetSurfP-2.0, Klausen et. al [36] state, “A structural dataset consisting of 12,185 crystal structures was obtained from the Protein Data Bank (PDB).”
- For Protein DataBank, Berman et. al [9] note data is submitted to the database through email or “AutoDep Input Tool (ADIT)” from any person or institution, with the author notified of a successful submission, or necessary revisions after the ADIT tool annotates for errors.
- For Fluorescence, Sarkisyan et. al [56] state they, “used fluorescence-activated cell sorting and sequenced the entire GFP coding region to assay the fluorescence of many thousands of genotypes created by random mutagenesis of the wildtype sequence.”
- For Stability, Rocklin et. al [54] generated the data themselves, by “[expressing oligo library synthesis technology] in yeast so that every cell displays many copies of one protein sequence on its surface... Cells are then incubated with varying concentrations of protease, those displaying resistant proteins are isolated by FACS, and the frequencies of each protein at each protease concentration are determined by deep sequencing (Fig. 1C, for reproducibility of the assay see Fig. S2). We then infer protease  $EC_{50}$  values for each sequence from these data by modeling the complete selection procedure (Fig. 1D, details given in Methods).”
- For EuroSat, Helber et. al [29] state that, “The dataset consists of 10 different classes with 2,000 to 3,000 images per class. In total, the dataset has 27,000 images ... [coming from] satellite images taken by the satellite Sentinel-2A ... over 34 European countries.”

## C PII and Offensive Content

To the best of our knowledge, none of the DABS 2.0 datasets contain information directly identifying people involved in the creation of the data. However, satellite imagery may contain enough information to locate the area on Earth the image comes from, and the land or property in the images may be owned by different people or organizations. We are not aware of any offensive content in the DABS 2.0 datasets.

## D Compute requirements

All runs were performed on an internal cluster with single Titan X GPUs. Most pretraining jobs required between 6 hours to 1 GPU-day, while the transfer jobs ranged from several minutes to approximately 1 GPU-day.

## E Additional Reproducibility Details

In this section, we describe additional details regarding the processing and use of each dataset. The Genomics, Higgs, and EuroSAT datasets were retrieved using TensorFlow Datasets [1].

### E.1 Bacterial Genomics

The genomic sequences from Genomics OOD [53] are exactly 250 base pairs (one of: A, G, T, C). The sequences are tokenized with a mapping of {A:0, C:1, G:2, T:3}. We use the `train` set for pretraining (split via a 90-10 train-test split). The `validation` and `validation-ood` sets are used for transfer training, and the `test` and `test-ood` sets are used for transfer evaluation.

### E.2 Semiconductor Wafer Manufacturing

Each wafer in WM-811K [74] consists of a 2D array of scalars where 0 represents the background, 1 represents functioning die (semiconducting material), and 2 represents defective die. There is

variation in the size of each wafer. We convert each scalar into a grayscale pigment representation, where 0 is converted to a black RGB pixel representation, 1 is converted to a 50% gray RGB pixel representation, and 2 is converted to a white RGB pixel representation. We resize all the wafers to be 32 x 32, with patch sizes of 4 x 4. The unlabeled split is used for pretraining, while the labeled split is used for transfer. We construct 90-10 train-test splits for both.

### **E.3 Particle Physics**

Of the 11M examples in HIGGS [7], we first create a random 90-10 pretrain-transfer split, and then create further 90-10 train-test splits for each. Each 1D scalar tabular feature is mapped to an embedding using a learned affine transformation.

### **E.4 Protein Biology**

All protein data sequences are tokenized with a given amino acid from "XARNDCQEGHILKMF-PSTWYVUOBZJ" being mapped to its index in the string (the mapping is zero-indexed, meaning for example, the amino acid N is tokenized to 3). All sequences are padded or truncated to 128 tokens, with X being the padding amino acid token. The Pfam dataset is split, leaving 200k of the 31M examples for transfer, and the remainder for pretraining. We produce 90-10 train-test splits for each phase.

### **E.5 Multispectral Satellite Imagery**

All images from EuroSAT [29] are of size 64 x 64, so there is no need for any resizing. Each channel is standardized to zero mean and unit variance based on the training set statistics. The images are divided into 8 x 8 sized patches before being passed into the embedding layer. We first create a random 90-10 pretrain-transfer split, and then create further 90-10 train-test splits for each phase.
